# Supplementary material for: Enzyme activity-modulated etching of gold nanobipyramids@MnO2 nanoparticles for ALP assay using surface-enhanced Raman spectroscopy
Source: Royal Society of Chemistry journal article supplement (doi:10.1039/d0nr01837f), 2020-01-01
Supplement: d0nr01837f1.pdf [file d0nr01837f1.pdf]

## *Supporting Information*

### **Enzyme activity-modulated etching of gold nanobipyramids@MnO<sub>2</sub> nanoparticles for ALP assay with surface-enhanced Raman spectroscopy**

Hua Liu,<sup>a</sup> Lin Wei,<sup>b</sup> Jianhao Hua,<sup>a</sup> Da Chen,<sup>c</sup> Hongmin Meng,<sup>d</sup> Zhaohui Li,<sup>\*d</sup> and Lehui Xiao<sup>\*a</sup>

<sup>a</sup> State Key Laboratory of Medicinal Chemical Biology, Tianjin Key Laboratory of Biosensing and Molecular Recognition, College of Chemistry, Nankai University, Tianjin, 300071, China

<sup>b</sup> College of Chemistry and Chemical Engineering, Hunan Normal University, Changsha 410081, China

<sup>c</sup> Center for Aircraft Fire and Emergency, Civil Aviation University of China, Tianjin 300300, China

<sup>d</sup> College of Chemistry, Zhengzhou University, Zhengzhou 450001, China

\* Corresponding author

Email: lehuixiao@nankai.edu.cn (L.X.), zhaohui.li@zzu.edu.cn (Z.L.).

## 1. Calculation of SERS enhancement factor

The enhancement factor is calculated by the formula:

$$Enhancement\ factor = \frac{I_{SERS} \times C_{dis}}{I_{Raman} \times C_{ad} \times f_{sh}}$$

$I_{SERS}$  and  $I_{Raman}$  represent the Raman intensity of the Au NBPs+CV system and CV solution at the 1618 cm<sup>-1</sup>, respectively.  $C_{dis}$  and  $C_{ad}$  are the CV concentrations in solution and adsorbed on the surface of nanoparticles, respectively. The factor  $f_{sh}$  takes into account the shielding of exciting and scattered light by colloidal particles. We have adopted a value of 0.25 for this factor.<sup>S1</sup> Raman measurements were carried out under the same experimental conditions including laser power, laser wavelength, and objective, etc..

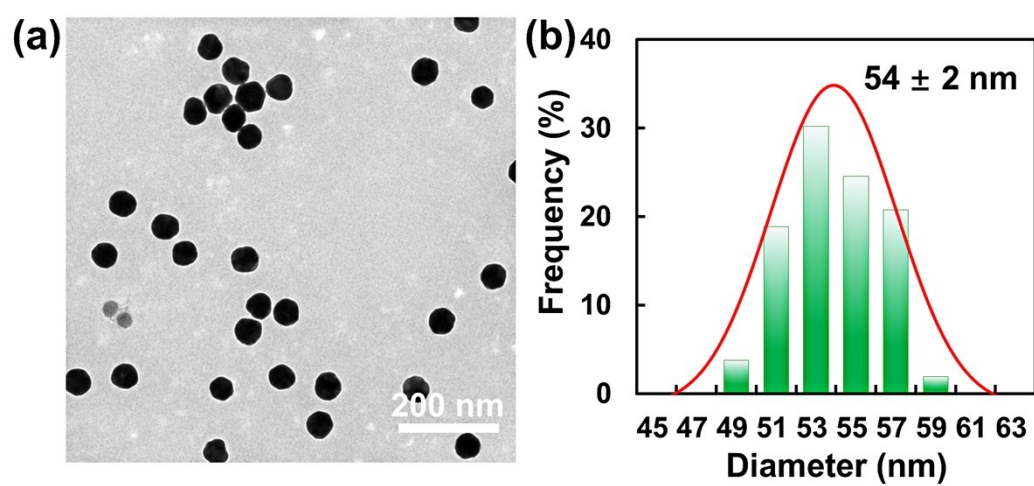

**Fig. S1** (a) TEM image and (b) particle size statistics of Au NPs.

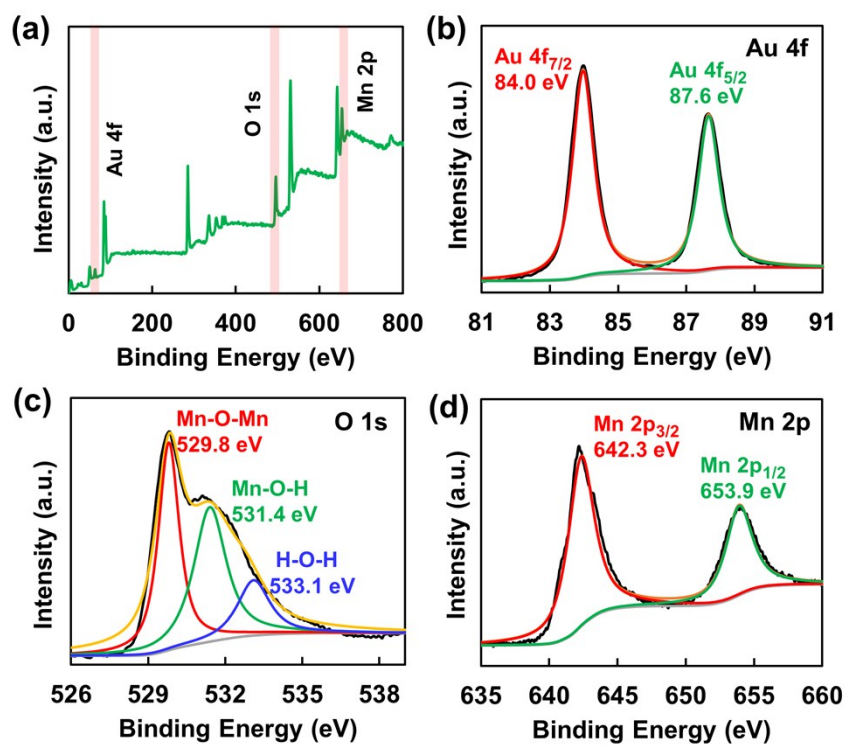

**Fig. S2** XPS analysis of AMNS. (A) The entire XPS spectrum of AMNS. (B) Au 4f spectrum. (C) O 1s spectrum. (D) Mn 2p spectrum.

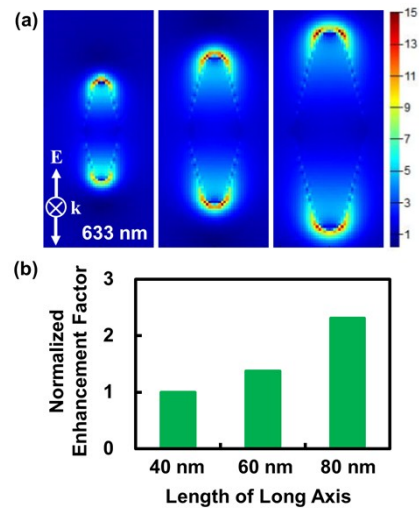

**Fig. S3** (a) Simulated electric field distribution of Au NBPs with different sizes. (b) The normalized enhancement factor of Au NBPs with different sizes.

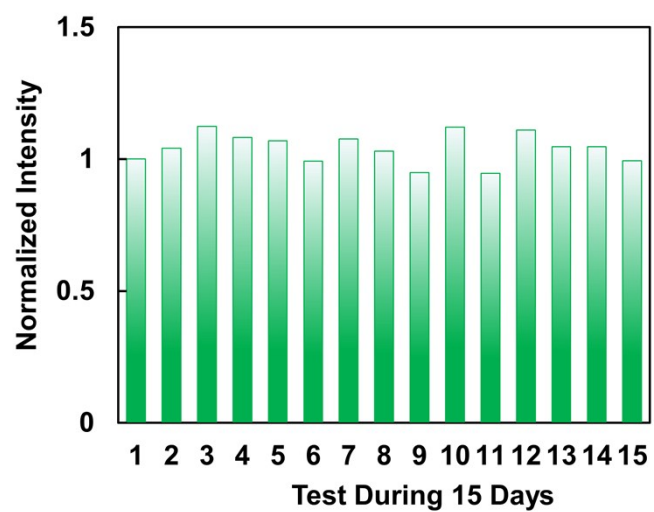

**Fig. S4** Stability assay of AMNS by 15 Raman measurements over 15 days period.

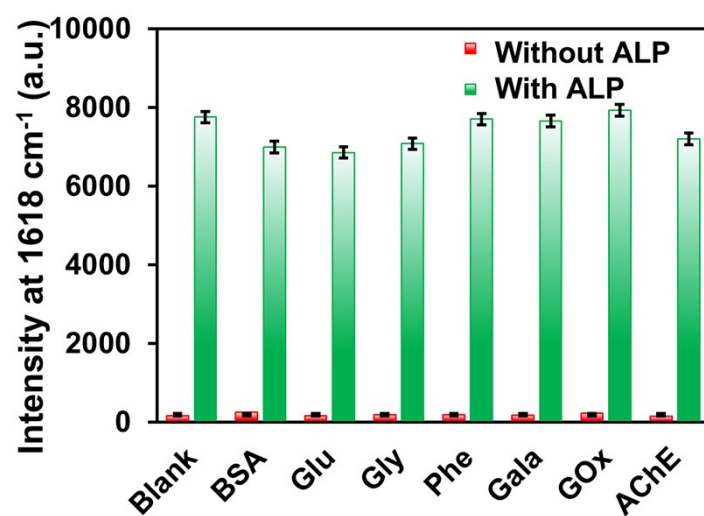

**Fig. S5** Selectivity assay for ALP detection.

**Table S1.** Comparison of different methods for ALP detection.

| <b>Methods</b> | <b>Linear range<br/>(mU/mL)</b> | <b>LOD<br/>(mU/mL)</b> | <b>Reference</b> |
|----------------|---------------------------------|------------------------|------------------|
| Fluorescence   | 10-2000                         | 3                      | 4                |
| Fluorescence   | 4.6-383.3                       | 1.4                    | S2               |
| Colorimetry    | 5-100                           | 3.3                    | S3               |
| Colorimetry    | 0-120                           | 5.4                    | 5                |
| Raman          | 1-10000                         | 1                      | 29               |
| Raman          | 0.4-20                          | 0.04                   | This work        |



## Supplementary References

- S1 P. Hildebrandt and M. Stockburger, *The Journal of Physical Chemistry*, 1984, **88**, 5935.
- S2 Z. Qian, L. Chai, C. Tang, Y. Huang, J. Chen and H. Feng, *Anal. Chem.*, 2015, **87**, 2966.
- S3 Z. Gao, K. Deng, X.-D. Wang, M. Miro and D. Tang, *ACS Appl. Mater. Interfaces*, 2014, **6**, 18243.
